# Supplementary material for: 24-Month Phase I/II Clinical Trial of Bimatoprost Sustained-Release Implant (Bimatoprost SR) in Glaucoma Patients
Source: PubMed Central journal article supplement — Drugs. 2019 Dec 28;80(2):167–79. doi: 10.1007/s40265-019-01248-0 (PMC7007425; doi:10.1007/s40265-019-01248-0), 2019-12-28
Supplement: 40265_2019_1248_MOESM3_ESM.pdf [file 40265_2019_1248_MOESM3_ESM.pdf]

### Online Resource 3 Eligibility criteria

| <b>Key Inclusion Criteria</b>                                                                                                                                                                                                                                    |
|------------------------------------------------------------------------------------------------------------------------------------------------------------------------------------------------------------------------------------------------------------------|
| ≥18 years of age                                                                                                                                                                                                                                                 |
| Diagnosis of OAG in the study eye, with >1 dB and <17 dB of mean deviation visual field loss on Humphrey perimetry (24-2 full threshold or SITA–standard program)                                                                                                |
| Diagnosis of OAG or ocular hypertension in the fellow eye that, in the investigator’s opinion, could be treated adequately with topical bimatoprost 0.03% monotherapy                                                                                            |
| History of a minimum of approximately 20% IOP lowering in response to a topical PGA ocular hypotensive medication                                                                                                                                                |
| Iridocorneal angle in the study eye ≥3 inferiorly (Shaffer grade), based on clinical gonioscopy, and of sufficient size to fit an implant without corneal endothelial cell touch on optical coherence tomography, as determined by an independent reading center |
| Post-washout IOP between 22 and 36 mm Hg (inclusively) in both eyes at hour 0 (8 AM ± 1 hour) at the baseline visit                                                                                                                                              |
| <b>Key Exclusion Criteria</b>                                                                                                                                                                                                                                    |
| History of posterior capsule tear during cataract surgery                                                                                                                                                                                                        |
| Any ocular surface finding with severity greater than trace on biomicroscopic examination at baseline                                                                                                                                                            |
| History of conjunctival hyperemia with severity greater than mild, due to bimatoprost or other PGA use                                                                                                                                                           |
| History of narrow-angle or closed-angle glaucoma                                                                                                                                                                                                                 |
| Central corneal thickness <470 μm or >630 μm, or a difference between eyes >70 μm                                                                                                                                                                                |
| Central corneal endothelial cell count <2000 cells/mm <sup>2</sup> by specular microscopy                                                                                                                                                                        |

*IOP* intraocular pressure, *OAG* open-angle glaucoma, *PGA* prostaglandin analog, *SITA* Swedish interactive thresholding algorithm
