# Supplementary material for: 24-Month Phase I/II Clinical Trial of Bimatoprost Sustained-Release Implant (Bimatoprost SR) in Glaucoma Patients
Source: PubMed Central journal article supplement — Drugs. 2019 Dec 28;80(2):167–79. doi: 10.1007/s40265-019-01248-0 (PMC7007425; doi:10.1007/s40265-019-01248-0), 2019-12-28
Supplement: 40265_2019_1248_MOESM6_ESM.pdf [file 40265_2019_1248_MOESM6_ESM.pdf]

**Online Resource 6** Patient baseline characteristics

| Parameter                                            | Bimatoprost SR<br>6 µg<br>(n = 18) | Bimatoprost SR<br>10 µg<br>(n = 21) | Bimatoprost SR<br>15 µg<br>(n = 21) | Bimatoprost SR<br>20 µg<br>(n = 15) |
|------------------------------------------------------|------------------------------------|-------------------------------------|-------------------------------------|-------------------------------------|
| Mean age (range), years                              | 60.4 (27–76)                       | 65.4 (52–77)                        | 63.2 (21–83)                        | 63.4 (34–82)                        |
| Male, n (%)                                          | 6 (33.3)                           | 12 (57.1)                           | 11 (52.4)                           | 8 (53.3)                            |
| Race, n (%)                                          |                                    |                                     |                                     |                                     |
| White                                                | 10 (55.6)                          | 15 (71.4)                           | 17 (81.0)                           | 11 (73.3)                           |
| Black                                                | 3 (16.7)                           | 4 (19.0)                            | 2 (9.5)                             | 3 (20.0)                            |
| Other                                                | 5 (27.8)                           | 2 (9.5)                             | 2 (9.5)                             | 1 (6.7)                             |
| Baseline IOP at hour 0, mm Hg, mean ± SD             |                                    |                                     |                                     |                                     |
| Study eye (Bimatoprost SR)                           | 25.1 ± 3.6                         | 24.5 ± 2.1                          | 25.1 ± 3.0                          | 26.6 ± 4.1                          |
| Fellow eye (topical bimatoprost 0.03%)               | 24.4 ± 3.8                         | 24.1 ± 2.1                          | 24.2 ± 3.3                          | 25.5 ± 4.0                          |
| Iris color in study eye, n (%)                       |                                    |                                     |                                     |                                     |
| Dark (brown or dark brown)                           | 13 (72.2)                          | 10 (47.6)                           | 10 (47.6)                           | 7 (46.7)                            |
| Light (any other color)                              | 5 (27.8)                           | 11 (52.4)                           | 11 (52.4)                           | 8 (53.3)                            |
| Lens status (both eyes), n (%)                       |                                    |                                     |                                     |                                     |
| Phakic                                               | 14 (77.8)                          | 14 (66.7)                           | 8 (38.1)                            | 9 (60.0)                            |
| Pseudophakic                                         | 4 (22.2)                           | 7 (33.3)                            | 13 (61.9)                           | 6(40.0)                             |
| CECD in study eye, cells/mm <sup>2</sup> , mean (SD) | 2712.6 (256.1)                     | 2691.3 (175.7)                      | 2663.4 (180.2)                      | 2738.7 (171.9)                      |
| CCT, µm, mean (SD)                                   |                                    |                                     |                                     |                                     |
| Study eye                                            | 552.1 (43.8)                       | 536.6 (45.8)                        | 562.3 (39.3)                        | 559.7 (41.4)                        |
| Fellow eye                                           | 559.4 (38.1)                       | 550.0 (58.0)                        | 568.8 (38.2)                        | 572.4 (74.5)                        |

*Bimatoprost SR* bimatoprost sustained-release implant, *CCT* central corneal thickness, *CECD* corneal endothelial cell density, *IOP* intraocular pressure, *SD* standard deviation
